# Supplementary material for: The sensitivity of aerosol data assimilation to vertical profiles: case study of dust storm assimilation with LOTOS-EUROS v2.2
Source: Copernicus journal article supplement (doi:10.5194/gmd-2024-113), 2024-09-19
Supplement: Supplementary file [file gmd-2024-113-AC1-supplement.pdf]

## Authors' Response to Reviews of

# The sensitivity of aerosol data assimilation to vertical profiles: case study of dust storm assimilation with LOTOS-EUROS v2.2

Mijie Pang, Jianbing Jin\*, Ting Yang, Xi Chen, Arjo Segers, Hai Xiang Lin, Hong Liao, and Wei Han\*

---

RC: *Reviewers' Comment*, AR: Authors' Response, □ Manuscript Text

RC: *Dear authors,*

*Unfortunately, after checking your manuscript, it has come to our attention that it does not comply with our "Code and Data Policy".*

*[https://www.geoscientific-model-development.net/policies/code\\_and\\_data\\_policy.html](https://www.geoscientific-model-development.net/policies/code_and_data_policy.html)*

*You have archived your code in a repository that does not comply with our trusted permanent archival policy (<https://airqualitymodeling.tno.nl/lotos-euros/open-source-version/>). We can not accept this. Therefore, you must publish your code in one of the appropriate repositories according to our policy. Note that we can not accept embargoes such as registration or previous contact with the authors to get access to the code.*

*In this way, you must reply to this comment with the link to the repository used in your manuscript, with its DOI. The reply and the repository should be available as soon as possible, and before the Discussions stage is closed, to be sure that anyone has access to it for review purposes.*

*Also, you must include in a potential reviewed version of your manuscript the modified 'Code and Data Availability' section and the DOI of the code. Also, remember to include a license for your code. If you do not do it, the code continues to be your property and can not be tested by others. Therefore, when uploading the code to the repository, you could want to choose a free software/open-source (FLOSS) license. We recommend the GPLv3. You only need to include the file '<https://www.gnu.org/licenses/gpl-3.0.txt>' as LICENSE.txt with your code. Also, you can choose other options that Zenodo provides: GPLv2, Apache License, MIT License, etc.*

*Please, reply as soon as possible to this comment with the link for it so that it is available for the peer-review process, as it should be. Additionally, be aware that failing to comply promptly with this request will result in rejecting your manuscript for publication.*

*Juan A. Añel*

*Geosci. Model Dev. Executive Editor*

AR: We would like to thank the editor for the reminding. We have published the LOTOS-EUROS code in Zenodo. A GPLv3 license file is also explicitly included in our repository. Below are the concerning links:

PyFilter is archived on Zenodo (<https://doi.org/10.5281/zenodo.14036308>) (Pang, 2024), also open at GitHub (<https://github.com/xxcvvv/open-PyFilter>). The source code of the LOTOS-EUROS model is available at <https://doi.org/10.5281/zenodo.14039267> (Segers, 2024). The CALIPSO data can be downloaded at <https://www-calipso.larc.nasa.gov/about/> (NASA, last access: August 2023). The ground PM<sub>10</sub> observations can be obtained at <https://quotsoft.net/air/> (Wang, last access: May, 2024). The Himawari-8 aerosol product is available at <https://www.eorc.jaxa.jp/ptree>.

## References

NASA: Cloud-Aerosol Lidar and Infrared Pathfinder Satellite Observations, last access: August 2023.

Pang, M.: Xxcvvv/Open-PyFilter: Pyfilter\_v1.1, Zenodo, , 2024.

Segers, A.: LOTOS-EUROS-v2.2 for GMD-2024-113, Zenodo, , 2024.

Wang, X.: Historical data on air quality in china, <https://quotsoft.net/air/>, last access: May. 2024.
